# Supplementary material for: A recurrent neural network model for biomass gasification chemistry
Source: Royal Society of Chemistry journal article supplement (doi:10.1039/d1re00409c), 2021-11-17
Supplement: d1re00409c1.pdf [file d1re00409c1.pdf]

# An RNN model for biomass gasification chemistry

Krishna Gopal Sharma,<sup>†</sup> Niket S. Kaisare,<sup>‡</sup> and Himanshu Goyal<sup>\*,‡</sup>

<sup>†</sup>*Department of Computer Science and Engineering, Indian Institute of Technology Madras,  
Chennai, Tamil Nadu 600036, India*

<sup>‡</sup>*Department of Chemical Engineering, Indian Institute of Technology Madras, Chennai,  
Tamil Nadu 600036, India*

E-mail: goyal@iitm.ac.in

Table S1: Biomass composition used to generate the primary product compositions in Step 1 of data generation.

| <b>Wood type</b> | <b>Cellulose</b> | <b>Hemicellulose</b> | <b>LIGC</b> | <b>LIGH</b> | <b>LIGO</b> | <b>Ash</b> |
|------------------|------------------|----------------------|-------------|-------------|-------------|------------|
| Cellulose        | 1                | 0                    | 0           | 0           | 0           | 0          |
| Hemicellulose    | 0                | 1                    | 0           | 0           | 0           | 0          |
| Lignin 1         | 0                | 0                    | 0.54        | 0.23        | 0.23        | 0          |
| Lignin 2         | 0.0797           | 0.0349               | 0.3784      | 0.3784      | 0           | 0.121      |
| Almond shell     | 0.3724           | 0.2023               | 0.0552      | 0.2865      | 0.0837      | 0          |
| Beech wood       | 0.4537           | 0.2419               | 0.0363      | 0.1021      | 0.1385      | 0.0270     |
| Poplar wood      | 0.4806           | 0.2611               | 0.0214      | 0.0957      | 0.1325      | 0.0086     |
| Softwood bark    | 0.2959           | 0.1608               | 0.0707      | 0.3107      | 0.1619      | 0          |
| Beech wood       | 0.4699           | 0.2553               | 0.0347      | 0.1604      | 0.0718      | 0.0080     |
| Maple wood       | 0.3829           | 0.2080               | 0.0511      | 0.2553      | 0.0872      | 0.0155     |

Table S2: Coefficient of determination ( $R^2$ ) of the predicted and the test set values for the selected RNN model architectures.

| <b>Product species</b> | <b>Model 1</b> | <b>Model 2</b> | <b>Model 3</b> |
|------------------------|----------------|----------------|----------------|
| H2                     | 0.9996         | 0.9998         | 0.9999         |
| H2O                    | 0.9997         | 0.9998         | 0.9999         |
| CO                     | 0.9996         | 0.9997         | 0.9998         |
| CO2                    | 0.9997         | 0.9997         | 0.9998         |
| CH2O                   | 0.9993         | 0.9997         | 0.9997         |
| CH4                    | 0.9995         | 0.9996         | 0.9997         |
| CH3OH                  | 0.9994         | 0.9996         | 0.9998         |
| C2H2                   | 0.9993         | 0.9997         | 0.9998         |
| CH3CHO                 | 0.9989         | 0.9998         | 0.9999         |
| C2H4                   | 0.9995         | 0.9997         | 0.9998         |
| C2H6                   | 0.9973         | 0.9996         | 0.9998         |
| CH3COCH3               | 0.9996         | 0.9998         | 0.9998         |
| A1-C6H6                | 0.9995         | 0.9997         | 0.9998         |
| C5H6                   | 0.9990         | 0.9996         | 0.9997         |
| A2-C10H8               | 0.9997         | 0.9998         | 0.9999         |
| A1OH-C6H6O             | 0.9995         | 0.9998         | 0.9999         |
| LVG-C6H10O5            | 0.9927         | 0.9997         | 0.9999         |
| HMFU-C6H6O3            | 0.9985         | 0.9997         | 0.9999         |
| C5H4O2                 | 0.9997         | 0.9998         | 0.9998         |
| C2H2O2                 | 0.9933         | 0.9996         | 0.9999         |
| HAA-C2H4O2             | 0.9929         | 0.9996         | 0.9999         |
| XYLOSE                 | 0.9984         | 0.9997         | 0.9998         |
| C11H12O4               | 0.9996         | 0.9998         | 0.9998         |
| C8H10O3                | 0.9995         | 0.9997         | 0.9998         |
| COUMARYL               | 0.9964         | 0.9997         | 0.9999         |
| C2H5OH                 | 0.9979         | 0.9996         | 0.9998         |
| HCOOH                  | 0.9996         | 0.9997         | 0.9998         |

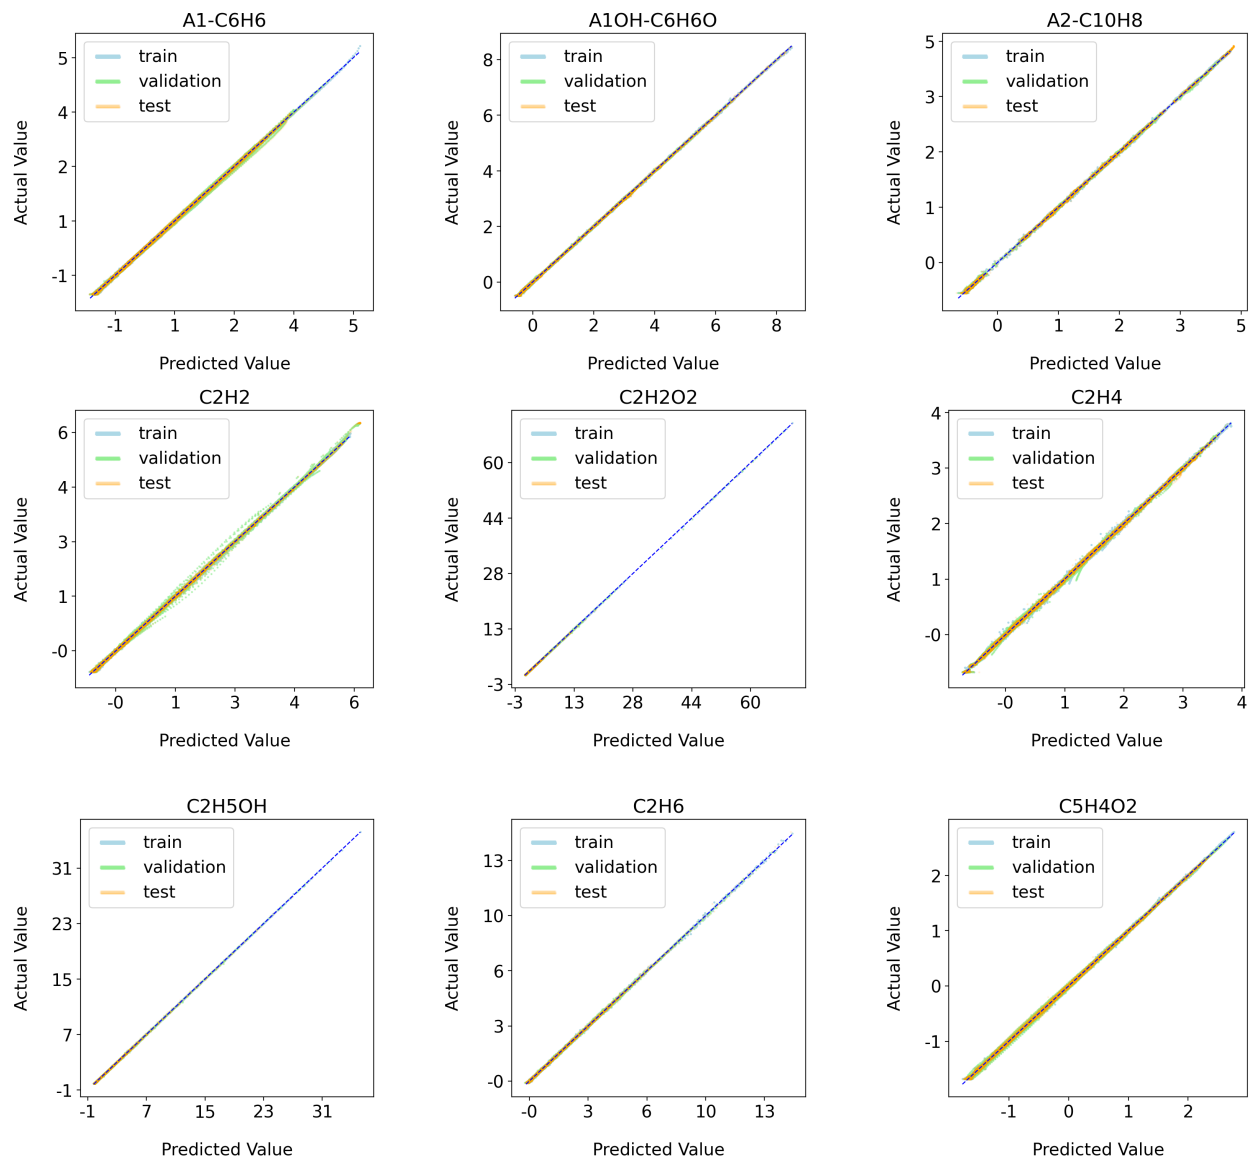

Figure S1: Parity plots for individual species using Model 3 (1 to 9).

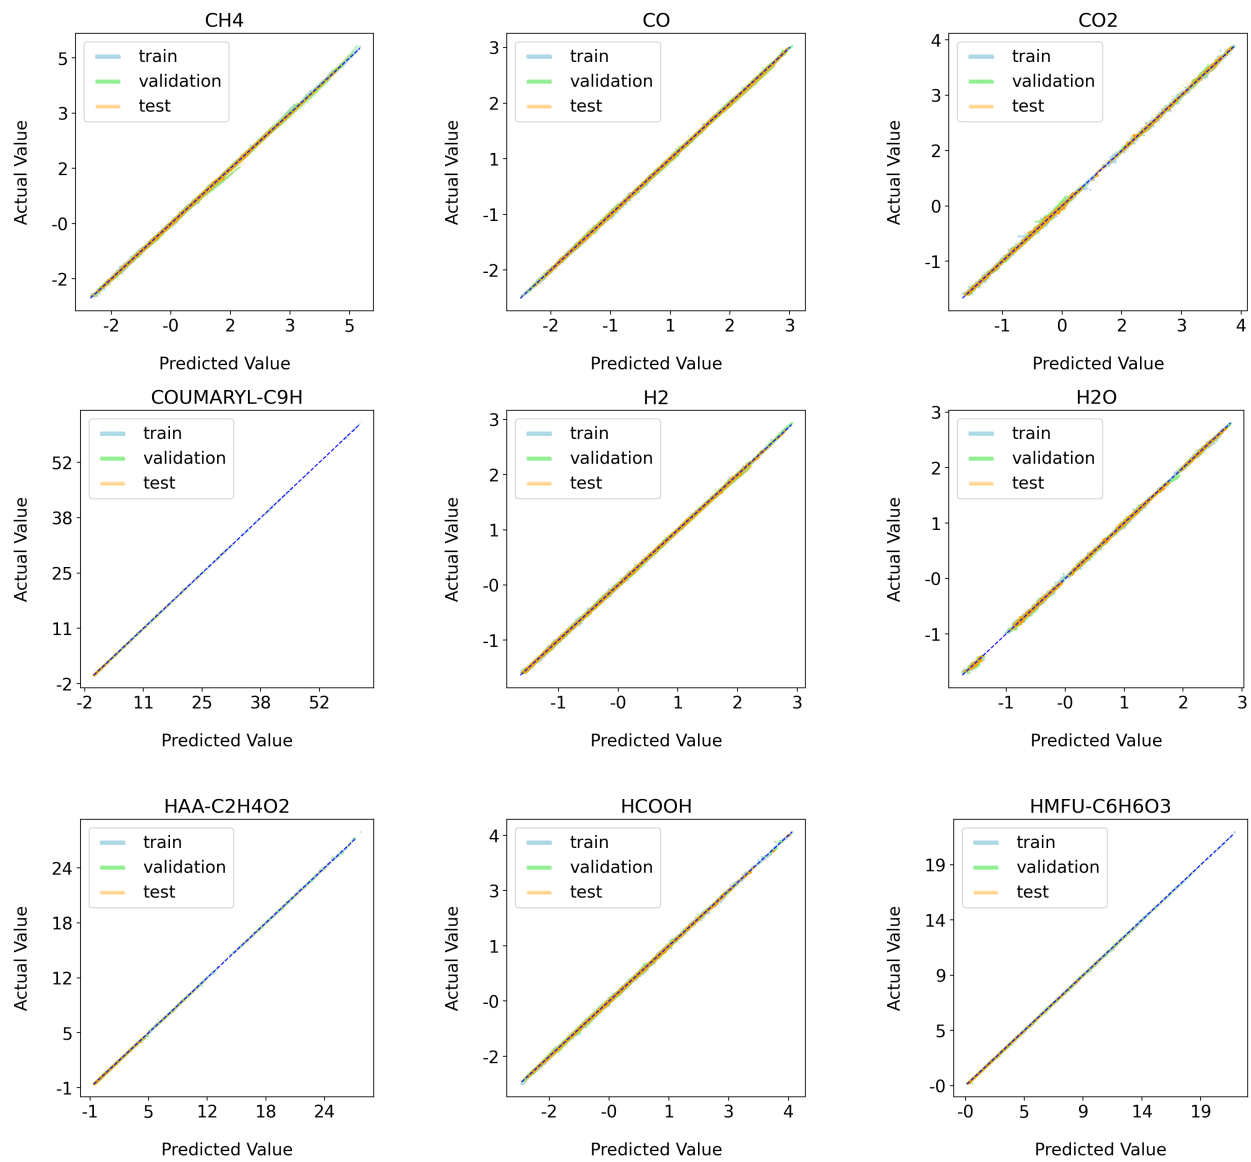

Figure S2: Parity plots for individual species using Model 3 (10 to 18).

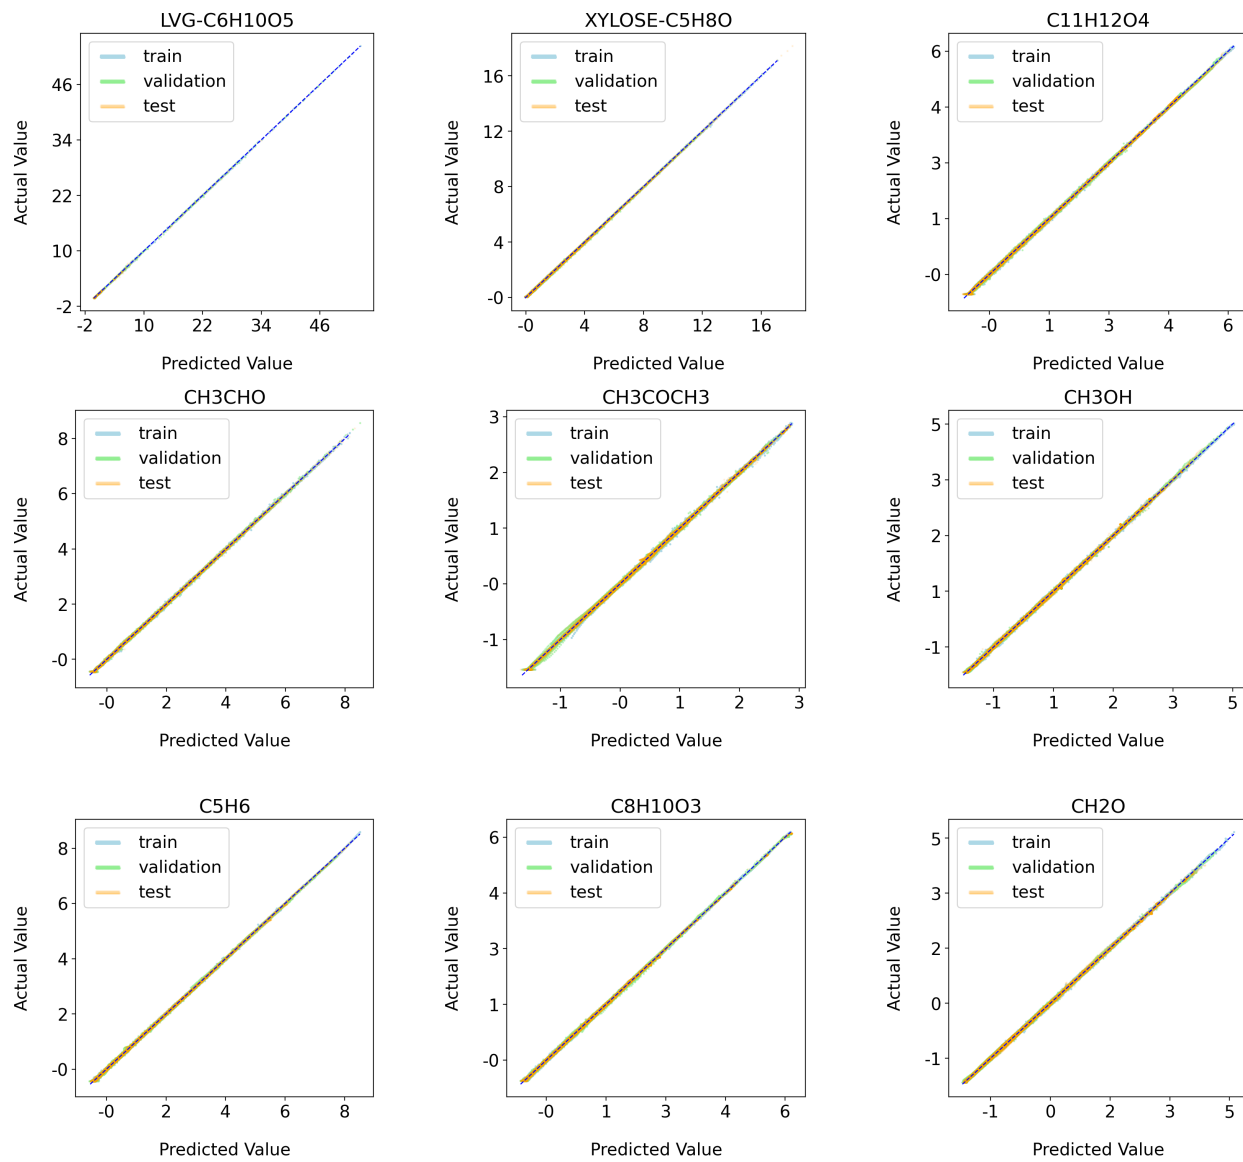

Figure S3: Parity plots for individual species using Model 3 (19 to 27).

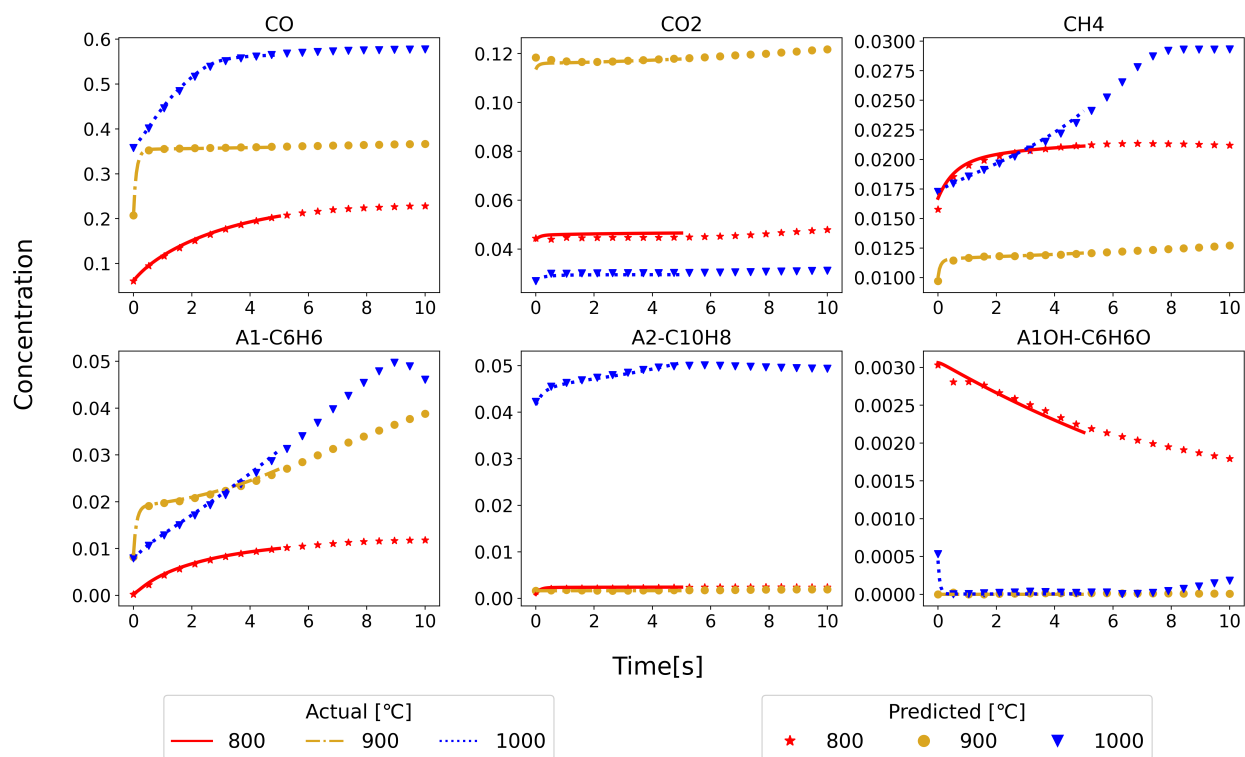

Figure S4: Comparison of the mass fraction profiles of major chemical species predicted by Model 3 (symbols) and test set data (solid lines) for different temperatures. Model predictions are made till ten seconds and the test data profiles are till five seconds.
